# Supplementary material for: Within-person variability in men’s facial width-to-height ratio
Source: PeerJ. 2016 Mar 10;4:e1801. doi: 10.7717/peerj.1801 (PMC4793305; doi:10.7717/peerj.1801)
Supplement: Table S1 — Raw data for the three studies. [file peerj-04-1801-s001.xlsx]

## Sheet: Study 1
Actor	Film	Image Number	WHR
Matt Damon	Ocean's Eleven	1	1.9451
Matt Damon	Ocean's Eleven	2	2.1333
Matt Damon	Ocean's Eleven	3	2.375
Matt Damon	Ocean's Eleven	4	2.1757
Matt Damon	Ocean's Eleven	5	2.407
Matt Damon	The Bourne Identity	6	1.85
Matt Damon	The Bourne Identity	7	2.1068
Matt Damon	The Bourne Identity	8	1.9623
Matt Damon	The Bourne Identity	9	2
Matt Damon	The Bourne Identity	10	1.975
Matt Damon	The Bourne Supremacy	11	2.1795
Matt Damon	The Bourne Supremacy	12	1.9167
Matt Damon	The Bourne Supremacy	13	2.1383
Matt Damon	The Bourne Supremacy	14	2.0294
Matt Damon	The Bourne Supremacy	15	2.0903
Matt Damon	Ocean's Twelve	16	2.0092
Matt Damon	Ocean's Twelve	17	2.0843
Matt Damon	Ocean's Twelve	18	2.134
Matt Damon	Ocean's Twelve	19	2.1215
Matt Damon	Ocean's Twelve	20	2.1121
Matt Damon	The Brothers Grimm	21	1.9722
Matt Damon	The Brothers Grimm	22	2.1026
Matt Damon	The Brothers Grimm	23	2.1216
Matt Damon	The Brothers Grimm	24	1.9143
Matt Damon	The Brothers Grimm	25	1.9691
Tom Cruise	Far and Away	1	2.1154
Tom Cruise	Far and Away	2	1.8991
Tom Cruise	Far and Away	3	2.0247
Tom Cruise	Far and Away	4	1.9545
Tom Cruise	Far and Away	5	2.05
Tom Cruise	A Few Good Men	6	2.037
Tom Cruise	A Few Good Men	7	2.0267
Tom Cruise	A Few Good Men	8	2.0556
Tom Cruise	A Few Good Men	9	2.0306
Tom Cruise	A Few Good Men	10	2.1418
Tom Cruise	The Firm	11	2.0254
Tom Cruise	The Firm	12	2.0439
Tom Cruise	The Firm	13	1.9231
Tom Cruise	The Firm	14	1.9898
Tom Cruise	The Firm	15	2.0192
Tom Cruise	Mission Impossible	16	1.9858
Tom Cruise	Mission Impossible	17	1.9857
Tom Cruise	Mission Impossible	18	2.119
Tom Cruise	Mission Impossible	19	1.9804
Tom Cruise	Mission Impossible	20	2.1308
Tom Cruise	Jerry Maguire	21	1.8526
Tom Cruise	Jerry Maguire	22	2.1027
Tom Cruise	Jerry Maguire	23	1.9109
Tom Cruise	Jerry Maguire	24	2.0174
Tom Cruise	Jerry Maguire	25	1.9263
Ben Affleck	Changing Lanes	1	1.9545
Ben Affleck	Changing Lanes	2	1.8793
Ben Affleck	Changing Lanes	3	1.973
Ben Affleck	Changing Lanes	4	2.0168
Ben Affleck	Changing Lanes	5	1.9045
Ben Affleck	The Sum of All Fears	6	1.9916
Ben Affleck	The Sum of All Fears	7	1.85
Ben Affleck	The Sum of All Fears	8	1.883
Ben Affleck	The Sum of All Fears	9	1.8868
Ben Affleck	The Sum of All Fears	10	2.0634
Ben Affleck	Paycheck	11	1.7674
Ben Affleck	Paycheck	12	1.9862
Ben Affleck	Paycheck	13	1.8966
Ben Affleck	Paycheck	14	1.8547
Ben Affleck	Paycheck	15	1.8913
Ben Affleck	Jersey Girl	16	1.7241
Ben Affleck	Jersey Girl	17	2.0476
Ben Affleck	Jersey Girl	18	1.8702
Ben Affleck	Jersey Girl	19	1.9286
Ben Affleck	Jersey Girl	20	1.7958
Ben Affleck	Gigli	21	1.9231
Ben Affleck	Gigli	22	1.8571
Ben Affleck	Gigli	23	1.8673
Ben Affleck	Gigli	24	1.8632
Ben Affleck	Gigli	25	1.8468
Ryan Reynolds	Definitely, Maybe	1	2
Ryan Reynolds	Definitely, Maybe	2	1.7661
Ryan Reynolds	Definitely, Maybe	3	1.955
Ryan Reynolds	Definitely, Maybe	4	1.8627
Ryan Reynolds	Definitely, Maybe	5	1.8583
Ryan Reynolds	Adventureland	6	1.8966
Ryan Reynolds	Adventureland	7	1.8815
Ryan Reynolds	Adventureland	8	1.964
Ryan Reynolds	Adventureland	9	1.8922
Ryan Reynolds	Adventureland	10	2.0155
Ryan Reynolds	The Nines	11	1.951
Ryan Reynolds	The Nines	12	2.0231
Ryan Reynolds	The Nines	13	2.0403
Ryan Reynolds	The Nines	14	1.814
Ryan Reynolds	The Nines	15	1.9451
Ryan Reynolds	X-Men Origins: Wolverine	16	1.7481
Ryan Reynolds	X-Men Origins: Wolverine	17	1.8871
Ryan Reynolds	X-Men Origins: Wolverine	18	1.9783
Ryan Reynolds	X-Men Origins: Wolverine	19	2.056
Ryan Reynolds	X-Men Origins: Wolverine	20	1.7634
Ryan Reynolds	The Proposal	21	1.9457
Ryan Reynolds	The Proposal	22	2.0303
Ryan Reynolds	The Proposal	23	1.875
Ryan Reynolds	The Proposal	24	1.9091
Ryan Reynolds	The Proposal	25	1.8963
John Cusack	High Fidelity	1	1.9211
John Cusack	High Fidelity	2	1.88
John Cusack	High Fidelity	3	2.1189
John Cusack	High Fidelity	4	1.8772
John Cusack	High Fidelity	5	1.931
John Cusack	Con Air	6	1.875
John Cusack	Con Air	7	1.8615
John Cusack	Con Air	8	1.9589
John Cusack	Con Air	9	1.8993
John Cusack	Con Air	10	1.9341
John Cusack	Serendipity	11	1.9286
John Cusack	Serendipity	12	1.8162
John Cusack	Serendipity	13	1.7836
John Cusack	Serendipity	14	1.9625
John Cusack	Serendipity	15	1.6609
John Cusack	Grosse Pointe Blank	16	1.8824
John Cusack	Grosse Pointe Blank	17	1.9664
John Cusack	Grosse Pointe Blank	18	1.7018
John Cusack	Grosse Pointe Blank	19	1.729
John Cusack	Grosse Pointe Blank	20	1.7532
John Cusack	Pushing Tin	21	1.6333
John Cusack	Pushing Tin	22	1.7128
John Cusack	Pushing Tin	23	1.8253
John Cusack	Pushing Tin	24	1.7952
John Cusack	Pushing Tin	25	1.8547

## Sheet: Study 2
ID	Camera Distance/cm	WHR
1	60	1.9706
1	90	1.995
1	120	2.0677
1	180	2.1383
1	240	2.1838
1	360	2.2151
1	480	2.2174
2	60	1.75
2	90	1.8168
2	120	1.8511
2	180	1.8962
2	240	1.9061
2	360	1.9121
2	480	1.927
3	60	1.7844
3	90	1.8626
3	120	1.9073
3	180	1.9307
3	240	1.9548
3	360	1.9698
3	480	1.9898
4	60	1.8592
4	90	2
4	120	2.0851
4	180	2.1444
4	240	2.1957
4	360	2.2418
4	480	2.2444
5	60	1.8971
5	90	1.9949
5	120	2.0464
5	180	2.0904
5	240	2.1164
5	360	2.133
5	480	2.1596
6	60	1.7589
6	90	1.7692
6	120	1.7972
6	180	1.8436
6	240	1.838
6	360	1.8657
6	480	1.8868
7	60	1.6
7	90	1.6667
7	120	1.7018
7	180	1.7244
7	240	1.7277
7	360	1.7523
7	480	1.7432
8	60	2
8	90	2.1405
8	120	2.1685
8	180	2.2034
8	240	2.2386
8	360	2.2717
8	480	2.2749
9	60	1.7641
9	90	1.861
9	120	1.9011
9	180	1.9441
9	240	1.9548
9	360	1.983
9	480	2.0233
10	60	1.8953
10	90	1.9405
10	120	1.9676
10	180	2
10	240	2.0389
10	360	2.0223
10	480	2.0339
11	60	1.8308
11	90	1.9282
11	120	1.9895
11	180	2.0262
11	240	2.0529
11	360	2.1611
11	480	2.1081
12	60	1.841
12	90	1.9247
12	120	1.9568
12	180	1.9945
12	240	2.0169
12	360	2.0339
12	480	2.0686
13	60	1.7719
13	90	1.8514
13	120	1.8721
13	180	1.9398
13	240	1.9674
13	360	2.0143
13	480	2.0616
14	60	1.7143
14	90	1.7763
14	120	1.8279
14	180	1.8364
14	240	1.8598
14	360	1.8667
14	480	1.8774
15	60	1.7018
15	90	1.7525
15	120	1.8083
15	180	1.8571
15	240	1.877
15	360	1.9032
15	480	1.9255
16	60	1.4047
16	90	1.4927
16	120	1.5099
16	180	1.5176
16	240	1.5803
16	360	1.6354
16	480	1.651
17	60	1.7009
17	90	1.8075
17	120	1.8349
17	180	1.9078
17	240	1.9231
17	360	1.9806
17	480	1.99
18	60	1.7581
18	90	1.823
18	120	1.8492
18	180	1.8737
18	240	1.9077
18	360	1.9231
18	480	1.9375
19	60	2.0615
19	90	2.1834
19	120	2.2121
19	180	2.2531
19	240	2.2981
19	360	2.3397
19	480	2.3313
20	60	1.6376
20	90	1.7327
20	120	1.7606
20	180	1.8134
20	240	1.8244
20	360	1.8398
20	480	1.8424
21	60	1.9372
21	90	2.0154
21	120	2.0781
21	180	2.1421
21	240	2.1649
21	360	2.2312
21	480	2.1818

## Sheet: Study 3
ID	Expression	WHR
3	Angry	1.7982
3	Contemptuous	1.8421
3	Disgusted	2.0928
3	Fearful	1.7586
3	Happy	1.8762
3	Neutral	1.8165
3	Sad	1.8
3	Surprised	1.632
5	Angry	2.1212
5	Contemptuous	2.09
5	Disgusted	2.1398
5	Fearful	1.9083
5	Happy	2.1134
5	Neutral	2.0505
5	Sad	1.9615
5	Surprised	1.9252
7	Angry	2.0194
7	Contemptuous	2.0396
7	Disgusted	2.3409
7	Fearful	1.9429
7	Happy	2.2366
7	Neutral	2.0396
7	Sad	1.9266
7	Surprised	2
9	Angry	2.0808
9	Contemptuous	2.0833
9	Disgusted	2.2727
9	Fearful	2.0303
9	Happy	2.3372
9	Neutral	2.0825
9	Sad	2.0625
9	Surprised	2
10	Angry	2.0729
10	Contemptuous	2.02
10	Disgusted	2.2111
10	Fearful	1.8545
10	Happy	2.2667
10	Neutral	1.9901
10	Sad	2.02
10	Surprised	1.8716
15	Angry	2.0097
15	Contemptuous	2.0928
15	Disgusted	2.2809
15	Fearful	1.9327
15	Happy	2.25
15	Neutral	2.0101
15	Sad	1.9804
15	Surprised	1.8785
20	Angry	1.9619
20	Contemptuous	2.0294
20	Disgusted	2.3647
20	Fearful	1.8839
20	Happy	2.1212
20	Neutral	1.9528
20	Sad	2
20	Surprised	1.8636
21	Angry	1.9524
21	Contemptuous	2.1798
21	Disgusted	2.4557
21	Fearful	1.9787
21	Happy	2.2771
21	Neutral	2.0211
21	Sad	2.1222
21	Surprised	2.0105
23	Angry	2.0722
23	Contemptuous	2.1263
23	Disgusted	2.4512
23	Fearful	2.0515
23	Happy	2.3647
23	Neutral	2.0938
23	Sad	2.1134
23	Surprised	2.0928
24	Angry	1.8938
24	Contemptuous	1.8496
24	Disgusted	2.0673
24	Fearful	1.7949
24	Happy	1.9907
24	Neutral	1.8938
24	Sad	1.819
24	Surprised	1.7731
25	Angry	1.8991
25	Contemptuous	1.9806
25	Disgusted	2.2043
25	Fearful	1.9423
25	Happy	2.102
25	Neutral	1.9434
25	Sad	2.1031
25	Surprised	1.7982
28	Angry	2.19
28	Contemptuous	2.2
28	Disgusted	2.6627
28	Fearful	2.0673
28	Happy	2.2143
28	Neutral	2.2525
28	Sad	2.1881
28	Surprised	2.0865
30	Angry	1.9434
30	Contemptuous	2.0097
30	Disgusted	2.2174
30	Fearful	1.9074
30	Happy	2.1915
30	Neutral	1.9808
30	Sad	1.9439
30	Surprised	1.8545
33	Angry	1.7909
33	Contemptuous	1.7818
33	Disgusted	2.1778
33	Fearful	1.6667
33	Happy	1.9899
33	Neutral	1.8396
33	Sad	1.7944
33	Surprised	1.713
36	Angry	2.2159
36	Contemptuous	1.9505
36	Disgusted	2.45
36	Fearful	1.8558
36	Happy	2.2135
36	Neutral	1.9216
36	Sad	1.94
36	Surprised	1.8462
38	Angry	1.9417
38	Contemptuous	1.9406
38	Disgusted	2.3855
38	Fearful	1.7434
38	Happy	2.1505
38	Neutral	1.99
38	Sad	1.9057
38	Surprised	1.7928
46	Angry	2.0286
46	Contemptuous	2.0693
46	Disgusted	2.2826
46	Fearful	1.875
46	Happy	2.25
46	Neutral	2.0714
46	Sad	1.9266
46	Surprised	1.8661
47	Angry	2.0909
47	Contemptuous	1.989
47	Disgusted	2.2532
47	Fearful	1.7692
47	Happy	2.2024
47	Neutral	1.9677
47	Sad	1.967
47	Surprised	1.8163
49	Angry	2.0412
49	Contemptuous	2.0842
49	Disgusted	2.3875
49	Fearful	1.9406
49	Happy	2.2874
49	Neutral	2.1064
49	Sad	2.0729
49	Surprised	2
71	Angry	1.9898
71	Contemptuous	2.0313
71	Disgusted	2.3494
71	Fearful	1.8654
71	Happy	2.1685
71	Neutral	1.9897
71	Sad	2.0638
71	Surprised	1.902
